# Supplementary material for: Multifunctional bio carbon: a coir pith waste derived electrode for extensive energy storage device applications
Source: Royal Society of Chemistry journal article supplement (doi:10.1039/c7ra03078a), 2017-01-01
Supplement: c7ra03078a1.pdf [file c7ra03078a1.pdf]

## Supporting Information

### Graphene Sheets like structured Carbon derived from Coir Pith Waste for Electrochemical Energy Storage Devices

*V. Mullaivananathan, P. Packiyalakshmi and N.Kalaiselvi\**

CSIR-Central Electrochemical Research Institute, Karaikudi-630 006, Tamilnadu, India.

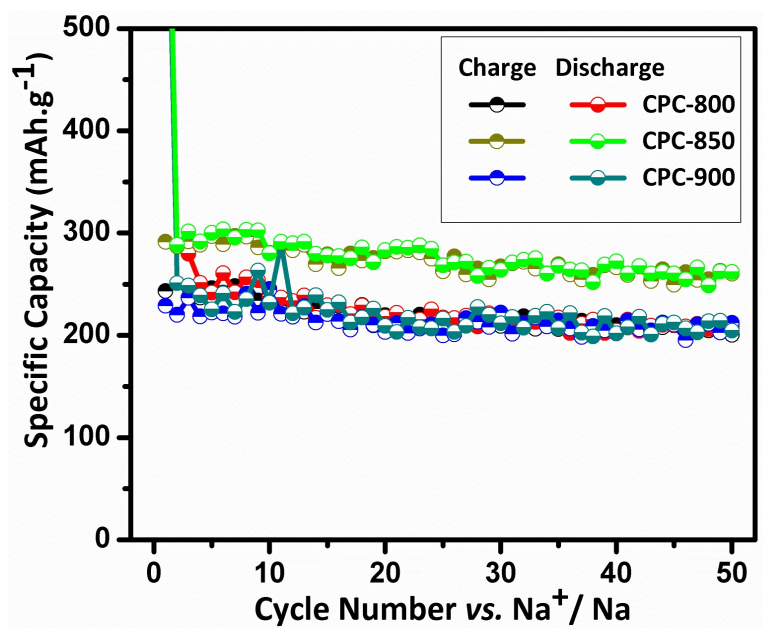

**Fig. S1** Cumulative electrochemical charge discharge behaviour of CPC-800, CPC-850 and CPC-900 anodes vs. Na<sup>+</sup>/Na at 50 mA g<sup>-1</sup> current condition

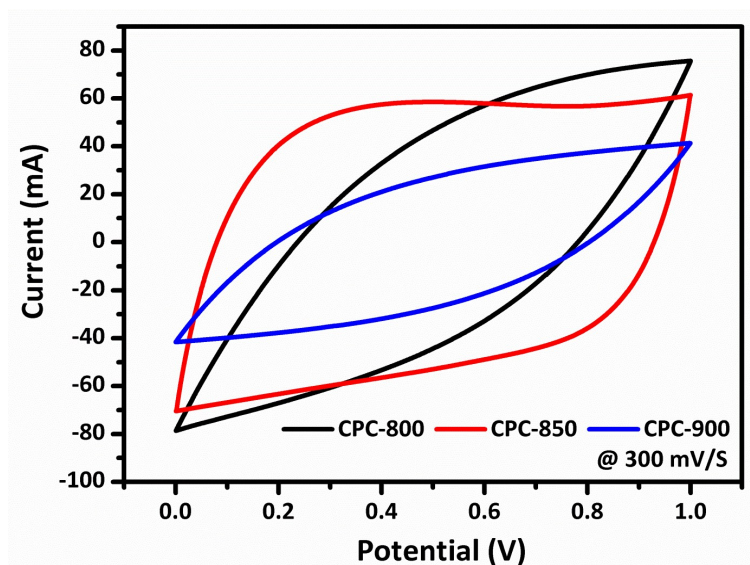

**Fig. S2** Cycling voltammogram of CPC//CPC capacitors at 300 mV s<sup>-1</sup> stability in 6M KOH electrolyte

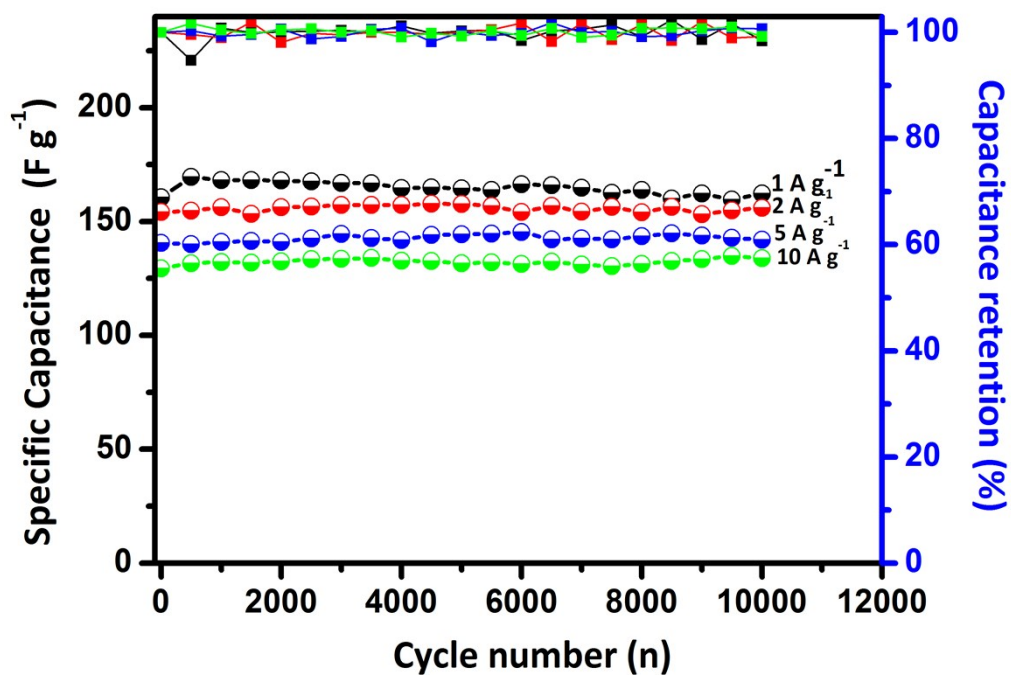

Fig. S3 Capacity retention behavior symmetric capacitor of CPC-850//CPC-850 symmetric cell at 1, 2 and 5 A g<sup>-1</sup> current densities for 10000 cycles

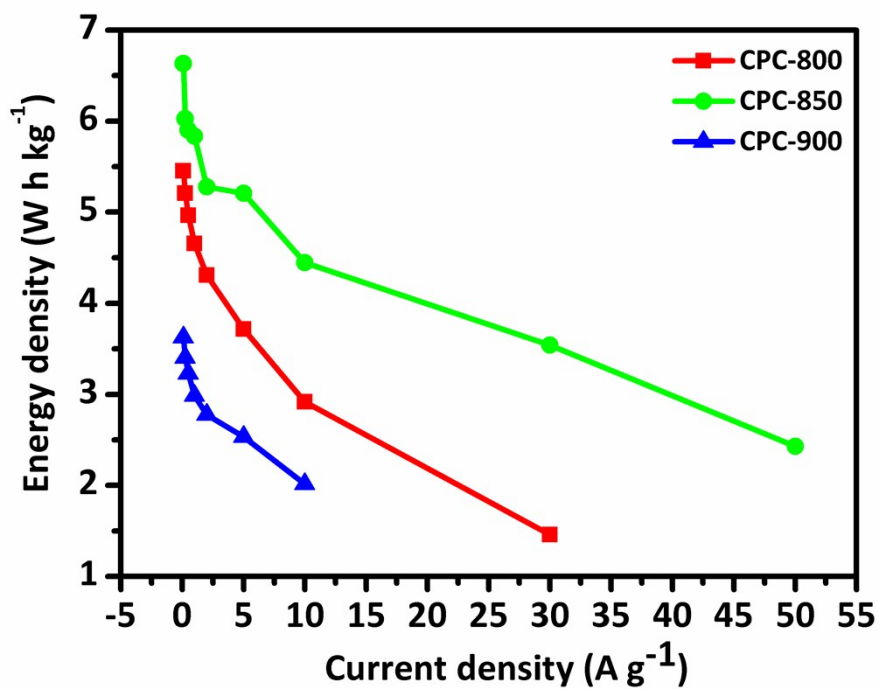

Fig. S4 Energy density values of CPC anodes at various current densities

**Table S1** Cycling performance of CPC-850 anode upon extended cycles at 50 mA g<sup>-1</sup> current density condition in SIBs

| Cycle no. | Charge capacity | Discharge capacity |
|-----------|-----------------|--------------------|
|           | (mAh /g)        | (mAh /g)           |
| 1         | 291             | 826                |
| 10        | 280             | 280                |
| 25        | 262             | 268                |
| 50        | 260             | 261                |
| 75        | 247             | 244                |
| 100       | 246             | 240                |
| 125       | 243             | 243                |
| 150       | 236             | 237                |
| 200       | 229             | 237                |
| 225       | 231             | 227                |
| 250       | 228             | 221                |
| 275       | 220             | 212                |
| 300       | 223             | 222                |
| 325       | 217             | 210                |
| 350       | 210             | 208                |

**Table S2** Cycling performance of CPC-850 anode upon extended cycles at 1000 mA g<sup>-1</sup> current density condition vs. Na<sup>+</sup>/Na

| Cycle No. | Charge capacity<br>(mAh g <sup>-1</sup> ) | Discharge capacity<br>(mAh g <sup>-1</sup> ) | Coulombic efficiency<br>(in %) |
|-----------|-------------------------------------------|----------------------------------------------|--------------------------------|
| 1         | 130                                       | 134                                          | 95                             |
| 2         | 130                                       | 131                                          | 99                             |
| 50        | 120                                       | 121                                          | 98                             |
| 100       | 127                                       | 130                                          | 100                            |
| 200       | 125                                       | 125                                          | 99                             |
| 300       | 117                                       | 118                                          | 99                             |
| 400       | 114                                       | 114                                          | 98                             |
| 500       | 113                                       | 114                                          | 99                             |
| 600       | 117                                       | 121                                          | 99                             |
| 700       | 107                                       | 107                                          | 100                            |
| 800       | 105                                       | 105                                          | 99                             |
| 900       | 100                                       | 100                                          | 98                             |
| 1000      | 114                                       | 114                                          | 99                             |

**Table S3** Comparison of electrochemical performance of CPC anode in Sodium ion batteries with some other recently reported biomass derived carbon materials as anode

| Carbon material                                           | Capacity<br>(mAh g <sup>-1</sup> )                                                                                                                           | Rate capability<br>(mAh g <sup>-1</sup> )                                                                                                          | Reference |
|-----------------------------------------------------------|--------------------------------------------------------------------------------------------------------------------------------------------------------------|----------------------------------------------------------------------------------------------------------------------------------------------------|-----------|
| Microporous carbon derived from coir pith waste (CPC-850) | <ul style="list-style-type: none"> <li>• 240 @ 0.05 A g<sup>-1</sup> in 150<sup>th</sup> cycle</li> <li>• 110 @ 1A g<sup>-1</sup> for 1000 cycles</li> </ul> | <ul style="list-style-type: none"> <li>• 110 @ 2 A g<sup>-1</sup> (5.37C)</li> <li>• 54 mAh g<sup>-1</sup> @5 A g<sup>-1</sup> (13.44C)</li> </ul> | This work |
| Furfuryl alcohol derived spherical carbon                 | 110 @ 0.2 Ag <sup>-1</sup> for 1000 cycles                                                                                                                   | 67 @ 1 A g <sup>-1</sup>                                                                                                                           | [S1]      |
| Human Hair derived carbon                                 | 230 @ 0.05 Ag <sup>-1</sup>                                                                                                                                  | 50 @ 2A g <sup>-1</sup>                                                                                                                            | [S2]      |
| Garlic Peel derived carbon                                | 200 at 0.1 A g <sup>-1</sup>                                                                                                                                 | 90 @ 1 A g <sup>-1</sup>                                                                                                                           | [S3]      |
| Coconut oil derived carbon                                | 203 at 0.1 A g <sup>-1</sup> in 50 <sup>th</sup> cycle                                                                                                       | 82 @ 1 A g <sup>-1</sup>                                                                                                                           | [S4]      |

**References:**

[S1] D. Zhou, M. Peer, Z. Yang, V.G. Pol, F.D. Key, J. Jorne, H.C. Foley, C.S. Johnson, *J. Mater.*

*Chem. A*, 2016, **4**, 6271-6275.

[S2] KR. Saravanan, V. Mullaivananathan, N. Kalaiselvi, *Electrochim. Acta*, 2015, **176**, 670–678

[S3] V. Selvamani R. Ravikumar V. Suryanarayanan D. Velayutham S. Gopukumar, *Electrochim.*

*Acta*, 2016, **190**, 337–345.

[S4] R. R. Gaddam, D. Yang, R. Narayan, K. Raju, N. A. Kumara, X.S. Zhao, *Nano Energy*, 2016,

**26**, 346–352.

**Table S4** Comparison of electrochemical performance of CPC electrode in EDLC with some other recently reported biomass derived carbon materials

| Carbon material                                           | Activation Method              | Capacitance (F g <sup>-1</sup> )                                                                                                                        | Energy Density (W h Kg <sup>-1</sup> )                                                                                                                     | Electrolyte | Reference |
|-----------------------------------------------------------|--------------------------------|---------------------------------------------------------------------------------------------------------------------------------------------------------|------------------------------------------------------------------------------------------------------------------------------------------------------------|-------------|-----------|
| Microporous carbon derived from coir pith waste (CPC-850) | KOH                            | <ul style="list-style-type: none"> <li>• 191 @ 0.1A g<sup>-1</sup></li> <li>• 128 @ 10 A g<sup>-1</sup></li> <li>• 102 @ 30 A g<sup>-1</sup></li> </ul> | <ul style="list-style-type: none"> <li>• 6.63 @ 0.1A g<sup>-1</sup></li> <li>• 4.44 @ 0.1A g<sup>-1</sup></li> <li>• 2.43 @ 0.1A g<sup>-1</sup></li> </ul> | 6 M KOH     | This work |
| Broad beans shells derived carbon                         | KOH                            | 129 @ 10 A g <sup>-1</sup>                                                                                                                              | -                                                                                                                                                          | 6 M KOH     | [S5]      |
| Rice husk derived carbon                                  | KOH                            | 147 @ 0.1A g <sup>-1</sup>                                                                                                                              | 5.11 @ 0.1A g <sup>-1</sup>                                                                                                                                | 6 M KOH     | [S6]      |
| Natural wood derived carbon                               | KOH                            | 200 @ 50 mV/s                                                                                                                                           | -                                                                                                                                                          | 6 M KOH     | [S7]      |
| Waste Paper derived carbon                                | KOH                            | 95 @ 25 mV/s                                                                                                                                            | -                                                                                                                                                          | 6 M KOH     | [S8]      |
| Scrap waste tire derived carbon                           | H <sub>3</sub> PO <sub>4</sub> | 120 @ 1A g <sup>-1</sup>                                                                                                                                | -                                                                                                                                                          | 6 M KOH     | [S9]      |

**References:**

- [S5] G. Xu, J. Han, B. Ding, P. Nie, J. Pan, H. Dou, H. Lia, X. Zhang, *Green Chem.*, 2015, **17**, 1668-1674
- [S6] E.Y. L. Teo, L. Muniandy, E.P. Ng, F. Adam, A.R. Mohamed. R. Jose, K. F. Chong, *Electrochim. Acta*, 2016, **192**, 110–119.
- [S7] L. Chen, T. Ji, L. Brisbin, J. Zhu, *ACS Appl. Mater. & Interfaces*, 2015, **7**, 12230-12237.
- [S8] D. Kalpana, S.H. Cho, S.B. Lee, Y.S. Lee, R. Misra, N.G. Renganathan, *J. Power Sources*, 2009, **2**, 587-591
- [S9] P. Zhao, Y. Han, X. Dong, C. Zhang, S. Liu, *ECS J. Solid State Science and Tech.*, 2015, **4**, 35-40.
